# Supplementary material for: Mechanisms linking metabolism of Helicobacter pylori to 18O and 13C-isotopes of human breath CO2
Source: PubMed Central journal article supplement (PMC4454186; doi:10.1038/srep10936), 2015-06-03
Supplement: srep10936-s1.pdf [file srep10936-s1.pdf]

## Supplementary information for

# Mechanisms linking metabolism of *Helicobacter pylori* to $^{18}\text{O}$ and $^{13}\text{C}$ -isotopes of human breath $\text{CO}_2$

Suman Som, Anulekha De, Gourab Dutta Banik, Abhijit Maity, Chiranjit Ghosh, Mithun Pal, Sunil B. Daschakraborty, Sujit Chaudhuri, Subhra Jana, and Manik Pradhan\*

\*Corresponding Author. Email: [manik.pradhan@bose.res.in](mailto:manik.pradhan@bose.res.in)

### Supplementary Table 1

Characteristics of enrolled 224 individuals. The datasheet includes HbA1c (%), Rapid Urease Test (RUT) and  $^{13}\text{C}$ -UBT reports of *H. pylori* positive [n=124] and *H. pylori* negative [n=100] individuals. For  $^{13}\text{C}$ -UBT results, (+) stands for positive and (-) stands for negative.

| Subjects | Sex<br>(M/F) | Age<br>(yrs.) | HbA1c<br>(%) | Endoscopy<br>& Biopsy<br>(Rapid Urease<br>Tests) | $^{13}\text{C}$ -UBT<br>(with<br>$\delta_{\text{DOB}}^{13}\text{C}$<br>‰ at 30<br>min) | Gastrointestinal<br>Disorders |
|----------|--------------|---------------|--------------|--------------------------------------------------|----------------------------------------------------------------------------------------|-------------------------------|
| GP1      | F            | 28            | 5.1          | Positive                                         | 5.6 (+)                                                                                | Active Deodenal Ulcer         |
| GP2      | M            | 42            | 5.0          | Positive                                         | 10.45 (+)                                                                              | Dypepsia                      |
| GP3      | M            | 39            | 5.0          | Positive                                         | 21.08 (+)                                                                              | Gastric Ulcer                 |
| GP4      | F            | 31            | 5.0          | Positive                                         | 18.78 (+)                                                                              | Dypepsia                      |
| GP5      | F            | 24            | 5.2          | Positive                                         | 3.95 (+)                                                                               | Dypepsia                      |
| GP6      | F            | 27            | 5.3          | Positive                                         | 12.45 (+)                                                                              | Deodenal Scarring             |
| GP7      | F            | 32            | 5.1          | Positive                                         | 17.48 (+)                                                                              | Active Deodenal Ulcer         |
| GP8      | M            | 48            | 5.0          | Positive                                         | 25.12 (+)                                                                              | Dypepsia                      |
| GP9      | M            | 26            | 5.0          | Positive                                         | 57.59 (+)                                                                              | Healing Ulcer                 |

|      |   |    |     |          |           |                       |
|------|---|----|-----|----------|-----------|-----------------------|
| GP10 | M | 61 | 5.1 | Positive | 33.12 (+) | Erosive Gastritis     |
| GP11 | M | 54 | 5.0 | Positive | 7.4 (+)   | Dyspepsia             |
| GP12 | M | 42 | 5.4 | Positive | 18.78 (+) | Dyspepsia             |
| GP13 | F | 28 | 5.2 | Positive | 29.98 (+) | Gastric Ulcer         |
| GP14 | F | 34 | 5.1 | Positive | 41.78 (+) | Active Deodenal Ulcer |
| GP15 | M | 56 | 5.1 | Positive | 5.45 (+)  | Active Deodenal Ulcer |
| GP16 | M | 58 | 5.1 | Positive | 8.46 (+)  | Gastric Ulcer         |
| GP17 | M | 49 | 5.1 | Positive | 14.59 (+) | Dyspepsia             |
| GP18 | M | 53 | 5.0 | Positive | 12.73 (+) | Dyspepsia             |
| GP19 | M | 37 | 5.0 | Positive | 10.57 (+) | Deodenal Scarring     |
| GP20 | F | 26 | 5.1 | Positive | 6.9 (+)   | Peptic Ulcer          |
| GP21 | M | 45 | 5.0 | Positive | 21.87 (+) | Dyspepsia             |
| GP22 | F | 25 | 5.0 | Positive | 56.20 (+) | Dyspepsia             |
| GP23 | M | 51 | 5.0 | Positive | 4.58 (+)  | Deodenal Scarring     |
| GP24 | F | 35 | 5.0 | Positive | 7.11 (+)  | Peptic Ulcer          |
| GP25 | F | 34 | 5.2 | Positive | 12.88 (+) | Healing Ulcer         |
| GP26 | F | 21 | 5.3 | Positive | 6.05 (+)  | Erosive Gastritis     |
| GP27 | M | 24 | 5.4 | Positive | 18.49 (+) | Dyspepsia             |
| GP28 | M | 57 | 5.0 | Positive | 28.77 (+) | Gastric Ulcer         |
| GP29 | M | 56 | 5.0 | Positive | 5.05 (+)  | Peptic Ulcer          |
| GP30 | M | 21 | 5.1 | Positive | 4.52 (+)  | Dyspepsia             |
| GP31 | M | 29 | 5.3 | Positive | 31.44 (+) | Dyspepsia             |
| GP32 | M | 23 | 5.2 | Positive | 9.53 (+)  | Active Deodenal Ulcer |
| GP33 | M | 28 | 5.1 | Positive | 12.35 (+) | Peptic Ulcer          |
| GP34 | M | 32 | 5.1 | Positive | 7.24 (+)  | Healing Ulcer         |
| GP35 | M | 57 | 5.1 | Positive | 8.4 (+)   | Dyspepsia             |
| GP36 | M | 52 | 5.0 | Positive | 11.57 (+) | Dyspepsia             |
| GP37 | M | 49 | 5.0 | Positive | 21.64 (+) | Dyspepsia             |
| GP38 | M | 38 | 5.4 | Positive | 38.22 (+) | Dyspepsia             |
| GP39 | F | 25 | 5.2 | Positive | 43.5 (+)  | Deodenal Scarring     |
| GP40 | F | 29 | 5.0 | Positive | 16.42 (+) | Peptic Ulcer          |
| GP41 | F | 42 | 5.0 | Positive | 12.09 (+) | Gastric Ulcer         |
| GP42 | M | 56 | 5.0 | Positive | 21.6 (+)  | Dyspepsia             |

|      |   |    |     |          |           |                       |
|------|---|----|-----|----------|-----------|-----------------------|
| GP43 | F | 27 | 5.0 | Positive | 8.52 (+)  | Dypepsia              |
| GP44 | M | 48 | 5.1 | Positive | 6.02 (+)  | Dypepsia              |
| GP45 | M | 43 | 5.2 | Positive | 47.45 (+) | Dypepsia              |
| GP46 | M | 53 | 5.2 | Positive | 32.05 (+) | Gastric Ulcer         |
| GP47 | F | 30 | 5.2 | Positive | 5.49 (+)  | Active Deodenal Ulcer |
| GP48 | F | 33 | 5.3 | Positive | 8.12 (+)  | Dypepsia              |
| GP49 | M | 45 | 5.3 | Positive | 4.87 (+)  | Active Deodenal Ulcer |
| GP50 | M | 29 | 5.3 | Positive | 10.2 (+)  | Peptic Ulcer          |
| GP51 | M | 28 | 5.3 | Positive | 23.89 (+) | Peptic Ulcer          |
| GP52 | F | 40 | 5.3 | Positive | 15.64 (+) | Gastric Ulcer         |
| GP53 | F | 28 | 5.3 | Positive | 12.7 (+)  | Deodenal Scarring     |
| GP54 | F | 36 | 5.3 | Positive | 28.95 (+) | Active Deodenal Ulcer |
| GP55 | F | 29 | 5.3 | Positive | 16.45 (+) | Deodenitis            |
| GP56 | F | 37 | 5.2 | Positive | 8.13 (+)  | Dypepsia              |
| GP57 | F | 42 | 5.0 | Positive | 7.68 (+)  | Dypepsia              |
| GP58 | F | 35 | 5.1 | Positive | 16.52 (+) | Dypepsia              |
| GP59 | M | 50 | 5.3 | Positive | 20.1 (+)  | Dypepsia              |
| GP60 | M | 43 | 5.1 | Positive | 5.52 (+)  | Dypepsia              |
| GP61 | M | 39 | 5.0 | Positive | 8.47 (+)  | Active Deodenal Ulcer |
| GP62 | M | 27 | 5.0 | Positive | 23.38 (+) | Gastric Ulcer         |
| GP63 | M | 31 | 5.1 | Positive | 34.15 (+) | Gastric Ulcer         |
| GP64 | M | 38 | 5.4 | Positive | 8.79 (+)  | Peptic Ulcer          |
| GP65 | M | 36 | 5.2 | Positive | 14.28 (+) | Deodenitis            |
| GP66 | F | 29 | 5.2 | Positive | 24.86 (+) | Deodenal Scarring     |
| GP67 | F | 41 | 5.0 | Positive | 8.9 (+)   | Active Deodenal Ulcer |
| GP68 | F | 37 | 5.1 | Positive | 10.76 (+) | Deodenitis            |
| GP69 | F | 31 | 5.2 | Positive | 6.48 (+)  | Peptic Ulcer          |
| GP70 | F | 46 | 5.0 | Positive | 7.82 (+)  | Active Deodenal Ulcer |
| GP71 | F | 33 | 5.4 | Positive | 12.76 (+) | Active Deodenal Ulcer |
| GP72 | F | 28 | 5.0 | Positive | 9.08 (+)  | Active Deodenal Ulcer |
| GP73 | F | 36 | 5.1 | Positive | 48.29 (+) | Peptic Ulcer          |
| GP74 | F | 31 | 5.2 | Positive | 10.08 (+) | Deodenitis            |
| GP75 | M | 55 | 5.2 | Positive | 23.72 (+) | Deodenitis            |

|       |   |    |     |          |           |                       |
|-------|---|----|-----|----------|-----------|-----------------------|
| GP76  | M | 50 | 5.1 | Positive | 13.98 (+) | Dypepsia              |
| GP77  | M | 54 | 5.0 | Positive | 49.05 (+) | Dypepsia              |
| GP78  | M | 39 | 5.4 | Positive | 37.38 (+) | Active Deodenal Ulcer |
| GP79  | F | 42 | 5.2 | Positive | 15.67 (+) | Peptic Ulcer          |
| GP80  | M | 56 | 5.1 | Positive | 37.08 (+) | Deodenitis            |
| GP81  | M | 46 | 5.3 | Positive | 26.69 (+) | Active Deodenal Ulcer |
| GP82  | M | 59 | 5.2 | Positive | 8.87 (+)  | Dypepsia              |
| GP83  | M | 46 | 5.2 | Positive | 17.9 (+)  | Dypepsia              |
| GP84  | F | 38 | 5.1 | Positive | 9.38 (+)  | Dypepsia              |
| GP85  | F | 32 | 5.2 | Positive | 10.7 (+)  | Dypepsia              |
| GP86  | F | 48 | 5.1 | Positive | 16.71 (+) | Dypepsia              |
| GP87  | F | 29 | 5.0 | Positive | 29.42 (+) | Dypepsia              |
| GP88  | F | 34 | 5.1 | Positive | 39.48 (+) | Dypepsia              |
| GP89  | F | 28 | 5.0 | Positive | 8.97 (+)  | Dypepsia              |
| GP90  | F | 33 | 5.1 | Positive | 10.58 (+) | Deodenitis            |
| GP91  | M | 39 | 5.2 | Positive | 37.18 (+) | Active Deodenal Ulcer |
| GP92  | M | 43 | 5.0 | Positive | 16.29 (+) | Peptic Ulcer          |
| GP93  | M | 28 | 5.1 | Positive | 5.92 (+)  | Peptic Ulcer          |
| GP94  | M | 30 | 5.0 | Positive | 16.59 (+) | Peptic Ulcer          |
| GP95  | M | 55 | 5.4 | Positive | 9.47 (+)  | Deodenal Scarring     |
| GP96  | M | 42 | 5.0 | Positive | 32.08 (+) | Deodenitis            |
| GP97  | F | 38 | 5.1 | Positive | 56.43 (+) | Active Deodenal Ulcer |
| GP98  | M | 49 | 5.3 | Positive | 19.27 (+) | Active Deodenal Ulcer |
| GP99  | F | 34 | 5.2 | Positive | 9.31 (+)  | Active Deodenal Ulcer |
| GP100 | M | 43 | 5.0 | Positive | 17.48 (+) | Active Deodenal Ulcer |
| GP101 | F | 46 | 5.1 | Positive | 15.4 (+)  | Dypepsia              |
| GP102 | F | 28 | 5.1 | Positive | 28.16 (+) | Active Deodenal Ulcer |
| GP103 | M | 34 | 5.2 | Positive | 33.28 (+) | Gastric Ulcer         |
| GP104 | M | 51 | 5.0 | Positive | 46.5 (+)  | Peptic Ulcer          |
| GP105 | F | 29 | 5.2 | Positive | 12.68 (+) | Active Deodenal Ulcer |
| GP106 | F | 38 | 5.3 | Positive | 8.47 (+)  | Active Deodenal Ulcer |
| GP107 | F | 36 | 5.1 | Positive | 5.05 (+)  | Dypepsia              |
| GP108 | F | 27 | 5.1 | Positive | 25.4 (+)  | Dypepsia              |

|       |   |    |     |          |           |                       |
|-------|---|----|-----|----------|-----------|-----------------------|
| GP109 | M | 55 | 5.2 | Positive | 18.78 (+) | Deodenitis            |
| GP110 | F | 43 | 5.0 | Positive | 10.45 (+) | Gastric Ulcer         |
| GP111 | M | 42 | 5.0 | Positive | 6.49 (+)  | Gastric Ulcer         |
| GP112 | F | 38 | 5.0 | Positive | 4.98 (+)  | Dypepsia              |
| GP113 | F | 26 | 5.0 | Positive | 16.73 (+) | Deodenal Scarring     |
| GP114 | F | 31 | 5.2 | Positive | 18.35 (+) | Deodenal Scarring     |
| GP115 | M | 57 | 5.2 | Positive | 9.2 (+)   | Deodenitis            |
| GP116 | M | 33 | 5.1 | Positive | 12.78 (+) | Deodenitis            |
| GP117 | M | 49 | 5.2 | Positive | 5.08 (+)  | Dypepsia              |
| GP118 | M | 56 | 5.3 | Positive | 8.48 (+)  | Peptic Ulcer          |
| GP119 | F | 32 | 5.1 | Positive | 18.45 (+) | Dypepsia              |
| GP120 | F | 26 | 5.0 | Positive | 25.12 (+) | Active Deodenal Ulcer |
| GP121 | F | 56 | 5.1 | Positive | 7.89 (+)  | Peptic Ulcer          |
| GP122 | M | 30 | 5.2 | Positive | 48.18 (+) | Active Deodenal Ulcer |
| GP123 | M | 38 | 5.0 | Positive | 12.45 (+) | Dypepsia              |
| GP124 | M | 52 | 5.0 | Positive | 4.85 (+)  | Dypepsia              |
| GN1   | M | 46 | 5.0 | Negative | 0.28 (-)  | X                     |
| GN2   | M | 34 | 5.2 | Negative | 0.1 (-)   | X                     |
| GN3   | M | 51 | 5.3 | Negative | 1.05 (-)  | X                     |
| GN4   | M | 49 | 5.1 | Negative | 0.89 (-)  | X                     |
| GN5   | F | 25 | 5.0 | Negative | 1.56 (-)  | X                     |
| GN6   | F | 30 | 5.0 | Negative | 0.45 (-)  | X                     |
| GN7   | M | 43 | 5.1 | Negative | 0.09 (-)  | X                     |
| GN8   | F | 27 | 5.2 | Negative | 1.24 (-)  | X                     |
| GN9   | F | 36 | 5.1 | Negative | 0.26 (-)  | X                     |
| GN10  | F | 29 | 5.1 | Negative | 1.25 (-)  | X                     |
| GN11  | M | 36 | 5.1 | Negative | 1.44 (-)  | X                     |
| GN12  | M | 43 | 5.1 | Negative | 1.09 (-)  | X                     |
| GN13  | M | 51 | 5.2 | Negative | 1.21 (-)  | X                     |
| GN14  | F | 26 | 5.0 | Negative | 0.56 (-)  | X                     |
| GN15  | F | 35 | 5.2 | Negative | 0.28 (-)  | X                     |
| GN16  | F | 33 | 5.1 | Negative | 0.73 (-)  | X                     |
| GN17  | M | 50 | 5.0 | Negative | 0.95 (-)  | X                     |

---

|      |   |    |     |          |           |   |
|------|---|----|-----|----------|-----------|---|
| GN18 | M | 53 | 5.0 | Negative | 1.06 (-)  | X |
| GN19 | M | 49 | 5.2 | Negative | 1.46 (-)  | X |
| GN20 | F | 42 | 5.3 | Negative | 0.23 (-)  | X |
| GN21 | F | 43 | 5.2 | Negative | -0.2 (-)  | X |
| GN22 | M | 30 | 5.2 | Negative | 0.89 (-)  | X |
| GN23 | M | 29 | 5.3 | Negative | 1.68 (-)  | X |
| GN24 | F | 25 | 5.4 | Negative | 1.49 (-)  | X |
| GN25 | F | 31 | 5.0 | Negative | 1.88 (-)  | X |
| GN26 | M | 28 | 5.0 | Negative | -0.52 (-) | X |
| GN27 | M | 42 | 5.0 | Negative | -0.09 (-) | X |
| GN28 | M | 58 | 5.0 | Negative | 0.88 (-)  | X |
| GN29 | F | 29 | 5.1 | Negative | -0.47 (-) | X |
| GN30 | M | 41 | 5.2 | Negative | 1.69 (-)  | X |
| GN31 | F | 35 | 5.1 | Negative | 0.97 (-)  | X |
| GN32 | M | 48 | 5.1 | Negative | 1.58 (-)  | X |
| GN33 | F | 32 | 5.2 | Negative | 0.28 (-)  | X |
| GN34 | M | 55 | 5.2 | Negative | 0.64 (-)  | X |
| GN35 | F | 28 | 5.1 | Negative | 0.76 (-)  | X |
| GN36 | F | 34 | 5.2 | Negative | 0.34 (-)  | X |
| GN37 | M | 41 | 5.3 | Negative | -0.48 (-) | X |
| GN38 | M | 30 | 5.1 | Negative | -0.71 (-) | X |
| GN39 | M | 47 | 5.0 | Negative | -0.05 (-) | X |
| GN40 | M | 58 | 5.1 | Negative | 1.25 (-)  | X |
| GN41 | F | 27 | 5.0 | Negative | 1.66 (-)  | X |
| GN42 | F | 29 | 5.0 | Negative | 1.08 (-)  | X |
| GN43 | M | 32 | 5.0 | Negative | 1.01 (-)  | X |
| GN44 | M | 55 | 5.4 | Negative | 1.25 (-)  | X |
| GN45 | F | 31 | 5.2 | Negative | 1.49 (-)  | X |
| GN46 | M | 43 | 5.2 | Negative | 0.33 (-)  | X |
| GN47 | F | 28 | 5.0 | Negative | 0.86 (-)  | X |
| GN48 | M | 39 | 5.3 | Negative | 0.41 (-)  | X |
| GN49 | M | 47 | 5.3 | Negative | 1.05 (-)  | X |
| GN50 | M | 58 | 5.1 | Negative | 0.55 (-)  | X |

---

---

|      |   |    |     |          |           |   |
|------|---|----|-----|----------|-----------|---|
| GN51 | M | 54 | 5.0 | Negative | -0.3 (-)  | X |
| GN52 | F | 29 | 5.0 | Negative | 0.67 (-)  | X |
| GN53 | M | 44 | 5.0 | Negative | 0.52 (-)  | X |
| GN54 | F | 31 | 5.0 | Negative | 0.43 (-)  | X |
| GN55 | M | 46 | 5.1 | Negative | 1.71 (-)  | X |
| GN56 | F | 33 | 5.1 | Negative | 1.59 (-)  | X |
| GN57 | F | 28 | 5.0 | Negative | 0.88 (-)  | X |
| GN58 | M | 49 | 5.1 | Negative | -0.19 (-) | X |
| GN59 | M | 35 | 5.0 | Negative | 0.49 (-)  | X |
| GN60 | M | 42 | 5.1 | Negative | 0.11 (-)  | X |
| GN61 | M | 46 | 5.1 | Negative | 0.46 (-)  | X |
| GN62 | M | 33 | 5.1 | Negative | 1.58 (-)  | X |
| GN63 | M | 40 | 5.0 | Negative | 0.59 (-)  | X |
| GN64 | M | 52 | 5.0 | Negative | 0.98 (-)  | X |
| GN65 | F | 34 | 5.0 | Negative | 1.05 (-)  | X |
| GN66 | F | 36 | 5.0 | Negative | 1.33 (-)  | X |
| GN67 | F | 26 | 5.1 | Negative | 0.92 (-)  | X |
| GN68 | M | 44 | 5.1 | Negative | -1.07 (-) | X |
| GN69 | M | 31 | 5.2 | Negative | 0.62 (-)  | X |
| GN70 | M | 38 | 5.1 | Negative | 0.83 (-)  | X |
| GN71 | M | 51 | 5.1 | Negative | 0.24 (-)  | X |
| GN72 | M | 33 | 5.1 | Negative | 0.77 (-)  | X |
| GN73 | M | 45 | 5.0 | Negative | 0.83 (-)  | X |
| GN74 | M | 30 | 5.0 | Negative | 0.49 (-)  | X |
| GN75 | M | 49 | 5.0 | Negative | 0.22 (-)  | X |
| GN76 | M | 56 | 5.2 | Negative | 0.51 (-)  | X |
| GN77 | F | 35 | 5.4 | Negative | 1.05 (-)  | X |
| GN78 | M | 41 | 5.0 | Negative | -0.07 (-) | X |
| GN79 | M | 40 | 5.1 | Negative | -0.58 (-) | X |
| GN80 | M | 29 | 5.2 | Negative | 0.79 (-)  | X |
| GN81 | M | 33 | 5.0 | Negative | 1.34 (-)  | X |
| GN82 | M | 60 | 5.0 | Negative | 0.92 (-)  | X |
| GN83 | M | 49 | 5.0 | Negative | 1.06 (-)  | X |

---

---

|       |   |    |     |          |           |   |
|-------|---|----|-----|----------|-----------|---|
| GN84  | M | 57 | 5.1 | Negative | 0.34 (-)  | X |
| GN85  | M | 39 | 5.3 | Negative | 0.21 (-)  | X |
| GN86  | M | 48 | 5.0 | Negative | -0.03 (-) | X |
| GN87  | M | 40 | 5.0 | Negative | 1.14 (-)  | X |
| GN88  | M | 46 | 5.1 | Negative | 1.89 (-)  | X |
| GN89  | F | 35 | 5.2 | Negative | -0.08 (-) | X |
| GN90  | F | 24 | 5.0 | Negative | -0.78 (-) | X |
| GN91  | M | 41 | 5.0 | Negative | 0.36 (-)  | X |
| GN92  | M | 32 | 5.1 | Negative | 0.22 (-)  | X |
| GN93  | M | 35 | 5.2 | Negative | 0.54 (-)  | X |
| GN94  | M | 26 | 5.0 | Negative | 1.28 (-)  | X |
| GN95  | M | 34 | 5.1 | Negative | 1.19 (-)  | X |
| GN96  | M | 59 | 5.2 | Negative | 0.87 (-)  | X |
| GN97  | F | 27 | 5.0 | Negative | 0.29 (-)  | X |
| GN98  | M | 46 | 5.0 | Negative | -0.15(-)  | X |
| GN99  | M | 38 | 5.0 | Negative | 0.56 (-)  | X |
| GN100 | M | 29 | 5.1 | Negative | 1.09 (-)  | X |

---



### Supplementary Table 2

Calibration for  $\delta^{13}\text{C}\text{‰}$ . Comparisons of the  $\delta^{13}\text{C}\text{‰}$  values measured by ICOS method with the certified calibration standards (Cambridge Isotope Laboratory, USA). SD corresponds to the 1 standard deviation of three successive measurements

| Certified $\delta^{13}\text{C}\text{‰}$ calibration standards analyzed by IRMS | $\delta^{13}\text{C}\text{‰} \pm \text{SD}$ by ICOS |
|--------------------------------------------------------------------------------|-----------------------------------------------------|
| -22.8                                                                          | $-23.0 \pm 0.05$                                    |
| -13.22                                                                         | $-13.20 \pm 0.05$                                   |
| -7.33                                                                          | $-7.33 \pm 0.05$                                    |

### Supplementary Table 3

Measurement Accuracy for  $\delta^{18}\text{O}\text{‰}$ . Results of  $\delta^{18}\text{O}\text{‰}$  measurements of seven flasks filled from a single certified standard NOAA air tank (Serial No.CB10073).

| Flask                     | $\delta^{18}\text{O}\text{‰}$ measured by ICOS method |
|---------------------------|-------------------------------------------------------|
| Flask-1                   | -1.02                                                 |
| Flask-2                   | -0.99                                                 |
| Flask-3                   | -1.01                                                 |
| Flask-4                   | -1.00                                                 |
| Flask-5                   | -1.01                                                 |
| Flask-6                   | -0.98                                                 |
| Flask-7                   | -1.00                                                 |
| Avg.                      | -1.00                                                 |
| NOAA                      | -1.00                                                 |
| <b>Standard Deviation</b> | $\pm 0.01$                                            |

### Supplementary Table 4

Receiver operating characteristic curve (ROC) analysis for the optimal diagnostic cut-off value of  $\delta_{\text{DOB}}^{18}\text{O}$  (‰) in breath  $\text{CO}_2$  associated with  $^{13}\text{C}$ -labelled glucose ( $^{13}\text{C}$ -G) metabolism in presence [H. p. (+)] and absence [H. p. (-)] of *H. pylori* infection. The selected optimal cut-off value has been highlighted. TP : True positive rate, FP : False positive rate, TN : True negative rate, FN : False negative rate.

| <b><math>^{13}\text{C}</math>-G<br/>[H.p (+) vs H.p (-)]</b> | <b>TP</b> | <b>FP</b> | <b>TN</b> | <b>FN</b> | <b>TP<br/>proportion<br/>(Sensitivity)</b> | <b>TN<br/>proportion<br/>(Specificity)</b> |
|--------------------------------------------------------------|-----------|-----------|-----------|-----------|--------------------------------------------|--------------------------------------------|
| -3.79                                                        | 70        | 56        | 1         | 0         | 1.000                                      | 0.018                                      |
| -3.22                                                        | 70        | 55        | 2         | 0         | 1.000                                      | 0.035                                      |
| -3.21                                                        | 70        | 54        | 3         | 0         | 1.000                                      | 0.053                                      |
| -3.16                                                        | 70        | 53        | 4         | 0         | 1.000                                      | 0.070                                      |
| -3.11                                                        | 70        | 52        | 5         | 0         | 1.000                                      | 0.088                                      |
| -3.11                                                        | 70        | 51        | 6         | 0         | 1.000                                      | 0.105                                      |
| -3.02                                                        | 70        | 48        | 9         | 0         | 1.000                                      | 0.158                                      |
| -3.00                                                        | 70        | 47        | 10        | 0         | 1.000                                      | 0.175                                      |
| -2.99                                                        | 70        | 46        | 11        | 0         | 1.000                                      | 0.193                                      |
| -2.56                                                        | 70        | 45        | 12        | 0         | 1.000                                      | 0.211                                      |
| -2.55                                                        | 70        | 43        | 14        | 0         | 1.000                                      | 0.246                                      |
| -2.50                                                        | 70        | 42        | 15        | 0         | 1.000                                      | 0.263                                      |
| -2.34                                                        | 70        | 41        | 16        | 0         | 1.000                                      | 0.281                                      |
| -2.33                                                        | 70        | 40        | 17        | 0         | 1.000                                      | 0.298                                      |
| -2.32                                                        | 70        | 39        | 18        | 0         | 1.000                                      | 0.316                                      |
| -2.17                                                        | 70        | 38        | 19        | 0         | 1.000                                      | 0.333                                      |
| -2.14                                                        | 70        | 37        | 20        | 0         | 1.000                                      | 0.351                                      |
| -2.11                                                        | 70        | 36        | 21        | 0         | 1.000                                      | 0.368                                      |
| -2.10                                                        | 70        | 35        | 22        | 0         | 1.000                                      | 0.386                                      |
| -2.08                                                        | 70        | 34        | 23        | 0         | 1.000                                      | 0.404                                      |
| -2.05                                                        | 70        | 33        | 24        | 0         | 1.000                                      | 0.421                                      |
| -2.01                                                        | 70        | 32        | 25        | 0         | 1.000                                      | 0.439                                      |
| -2.00                                                        | 70        | 31        | 26        | 0         | 1.000                                      | 0.456                                      |
| -2.00                                                        | 70        | 29        | 28        | 0         | 1.000                                      | 0.491                                      |
| -1.99                                                        | 70        | 28        | 29        | 0         | 1.000                                      | 0.509                                      |
| -1.99                                                        | 70        | 27        | 30        | 0         | 1.000                                      | 0.526                                      |
| -1.95                                                        | 70        | 26        | 31        | 0         | 1.000                                      | 0.544                                      |
| -1.66                                                        | 70        | 24        | 33        | 0         | 1.000                                      | 0.579                                      |
| -1.56                                                        | 70        | 23        | 34        | 0         | 1.000                                      | 0.596                                      |
| -1.44                                                        | 70        | 22        | 35        | 0         | 1.000                                      | 0.614                                      |
| -1.37                                                        | 70        | 21        | 36        | 0         | 1.000                                      | 0.632                                      |

---

|       |    |    |    |    |       |       |
|-------|----|----|----|----|-------|-------|
| -1.33 | 70 | 20 | 37 | 0  | 1.000 | 0.649 |
| -1.29 | 70 | 19 | 38 | 0  | 1.000 | 0.667 |
| -1.26 | 70 | 18 | 39 | 0  | 1.000 | 0.684 |
| -1.25 | 70 | 17 | 40 | 0  | 1.000 | 0.702 |
| -1.22 | 70 | 16 | 41 | 0  | 1.000 | 0.719 |
| -1.21 | 70 | 15 | 42 | 0  | 1.000 | 0.737 |
| -0.70 | 70 | 14 | 43 | 0  | 1.000 | 0.754 |
| -0.20 | 70 | 13 | 44 | 0  | 1.000 | 0.772 |
| 0.11  | 70 | 12 | 45 | 0  | 1.000 | 0.789 |
| 0.22  | 70 | 11 | 46 | 0  | 1.000 | 0.807 |
| 0.33  | 70 | 10 | 47 | 0  | 1.000 | 0.825 |
| 1.19  | 70 | 9  | 48 | 0  | 1.000 | 0.842 |
| 1.22  | 70 | 8  | 49 | 0  | 1.000 | 0.860 |
| 1.23  | 70 | 7  | 50 | 0  | 1.000 | 0.877 |
| 1.28  | 70 | 6  | 51 | 0  | 1.000 | 0.895 |
| 1.33  | 70 | 5  | 52 | 0  | 1.000 | 0.912 |
| 1.38  | 70 | 4  | 53 | 0  | 1.000 | 0.930 |
| 1.38  | 70 | 3  | 54 | 0  | 1.000 | 0.947 |
| 1.41  | 70 | 2  | 55 | 0  | 1.000 | 0.965 |
| 1.42  | 70 | 1  | 56 | 0  | 1.000 | 0.982 |
| 1.44  | 70 | 0  | 57 | 0  | 1.000 | 1.000 |
| 1.66  | 69 | 0  | 57 | 1  | 0.986 | 1.000 |
| 1.70  | 68 | 0  | 57 | 2  | 0.971 | 1.000 |
| 1.74  | 67 | 0  | 57 | 3  | 0.957 | 1.000 |
| 1.80  | 66 | 0  | 57 | 4  | 0.943 | 1.000 |
| 1.85  | 65 | 0  | 57 | 5  | 0.929 | 1.000 |
| 1.89  | 64 | 0  | 57 | 6  | 0.914 | 1.000 |
| 1.94  | 63 | 0  | 57 | 7  | 0.900 | 1.000 |
| 1.96  | 62 | 0  | 57 | 8  | 0.886 | 1.000 |
| 1.99  | 61 | 0  | 57 | 9  | 0.871 | 1.000 |
| 2.01  | 60 | 0  | 57 | 10 | 0.857 | 1.000 |
| 2.11  | 59 | 0  | 57 | 11 | 0.843 | 1.000 |
| 2.42  | 58 | 0  | 57 | 12 | 0.829 | 1.000 |
| 2.89  | 57 | 0  | 57 | 13 | 0.814 | 1.000 |
| 2.95  | 55 | 0  | 57 | 15 | 0.786 | 1.000 |
| 2.99  | 54 | 0  | 57 | 16 | 0.771 | 1.000 |
| 3.05  | 53 | 0  | 57 | 17 | 0.757 | 1.000 |
| 3.11  | 52 | 0  | 57 | 18 | 0.743 | 1.000 |
| 3.11  | 51 | 0  | 57 | 19 | 0.729 | 1.000 |
| 3.12  | 50 | 0  | 57 | 20 | 0.714 | 1.000 |
| 3.21  | 49 | 0  | 57 | 21 | 0.700 | 1.000 |
| 3.21  | 48 | 0  | 57 | 22 | 0.686 | 1.000 |
| 3.22  | 47 | 0  | 57 | 23 | 0.671 | 1.000 |
| 3.55  | 46 | 0  | 57 | 24 | 0.657 | 1.000 |
| 3.55  | 45 | 0  | 57 | 25 | 0.643 | 1.000 |
| 3.58  | 44 | 0  | 57 | 26 | 0.629 | 1.000 |
| 3.88  | 43 | 0  | 57 | 27 | 0.614 | 1.000 |
| 3.99  | 41 | 0  | 57 | 29 | 0.586 | 1.000 |
| 3.99  | 40 | 0  | 57 | 30 | 0.571 | 1.000 |
| 4.00  | 39 | 0  | 57 | 31 | 0.557 | 1.000 |

---

---

|       |    |   |    |    |       |       |
|-------|----|---|----|----|-------|-------|
| 4.00  | 38 | 0 | 57 | 32 | 0.543 | 1.000 |
| 4.02  | 37 | 0 | 57 | 33 | 0.529 | 1.000 |
| 4.03  | 36 | 0 | 57 | 34 | 0.514 | 1.000 |
| 4.10  | 35 | 0 | 57 | 35 | 0.500 | 1.000 |
| 4.11  | 34 | 0 | 57 | 36 | 0.486 | 1.000 |
| 4.11  | 33 | 0 | 57 | 37 | 0.471 | 1.000 |
| 4.12  | 32 | 0 | 57 | 38 | 0.457 | 1.000 |
| 4.12  | 31 | 0 | 57 | 39 | 0.443 | 1.000 |
| 4.14  | 30 | 0 | 57 | 40 | 0.429 | 1.000 |
| 4.15  | 29 | 0 | 57 | 41 | 0.414 | 1.000 |
| 4.20  | 28 | 0 | 57 | 42 | 0.400 | 1.000 |
| 4.22  | 27 | 0 | 57 | 43 | 0.386 | 1.000 |
| 4.25  | 26 | 0 | 57 | 44 | 0.371 | 1.000 |
| 4.33  | 25 | 0 | 57 | 45 | 0.357 | 1.000 |
| 4.49  | 24 | 0 | 57 | 46 | 0.343 | 1.000 |
| 4.55  | 23 | 0 | 57 | 47 | 0.329 | 1.000 |
| 4.66  | 22 | 0 | 57 | 48 | 0.314 | 1.000 |
| 4.78  | 21 | 0 | 57 | 49 | 0.300 | 1.000 |
| 4.88  | 20 | 0 | 57 | 50 | 0.286 | 1.000 |
| 4.98  | 19 | 0 | 57 | 51 | 0.271 | 1.000 |
| 4.99  | 18 | 0 | 57 | 52 | 0.257 | 1.000 |
| 5.01  | 17 | 0 | 57 | 53 | 0.243 | 1.000 |
| 5.08  | 15 | 0 | 57 | 55 | 0.214 | 1.000 |
| 5.22  | 14 | 0 | 57 | 56 | 0.200 | 1.000 |
| 5.31  | 13 | 0 | 57 | 57 | 0.186 | 1.000 |
| 5.33  | 12 | 0 | 57 | 58 | 0.171 | 1.000 |
| 5.37  | 11 | 0 | 57 | 59 | 0.157 | 1.000 |
| 5.66  | 10 | 0 | 57 | 60 | 0.143 | 1.000 |
| 5.88  | 9  | 0 | 57 | 61 | 0.129 | 1.000 |
| 6.22  | 8  | 0 | 57 | 62 | 0.114 | 1.000 |
| 6.94  | 7  | 0 | 57 | 63 | 0.100 | 1.000 |
| 6.99  | 6  | 0 | 57 | 64 | 0.086 | 1.000 |
| 7.00  | 4  | 0 | 57 | 66 | 0.057 | 1.000 |
| 7.33  | 3  | 0 | 57 | 67 | 0.043 | 1.000 |
| 8.99  | 2  | 0 | 57 | 68 | 0.029 | 1.000 |
| 9.33  | 1  | 0 | 57 | 69 | 0.014 | 1.000 |
| 14.12 | 0  | 0 | 57 | 70 | 0.000 | 1.000 |

---

### Supplementary Table 5

Receiver operating characteristic curve (ROC) analysis for the optimal diagnostic cut-off value of  $\delta_{\text{DOB}}^{18}\text{O}$  (‰) in breath  $\text{CO}_2$  associated with unlabelled glucose (12C-G) metabolism in presence [H. p. (+)] and absence [H. p. (-)] of *H. pylori* infection. The selected optimal cut-off value has been highlighted. TP : True positive rate, FP : False positive rate, TN : True negative rate, FN : False negative rate.

| <b>12C-G<br/>[H.p (+) vs.p (-)]</b> | <b>TP</b> | <b>FP</b> | <b>TN</b> | <b>FN</b> | <b>TP<br/>proportion<br/>(Sensitivity)</b> | <b>TN<br/>proportion<br/>(Specificity)</b> |
|-------------------------------------|-----------|-----------|-----------|-----------|--------------------------------------------|--------------------------------------------|
| -3.51                               | 52        | 44        | 1         | 0         | 1.000                                      | 0.022                                      |
| -1.95                               | 52        | 43        | 2         | 0         | 1.000                                      | 0.044                                      |
| -1.51                               | 52        | 42        | 3         | 0         | 1.000                                      | 0.067                                      |
| -1.45                               | 52        | 41        | 4         | 0         | 1.000                                      | 0.089                                      |
| -1.37                               | 52        | 40        | 5         | 0         | 1.000                                      | 0.111                                      |
| -1.33                               | 52        | 39        | 6         | 0         | 1.000                                      | 0.133                                      |
| -1.22                               | 52        | 38        | 7         | 0         | 1.000                                      | 0.156                                      |
| -1.01                               | 52        | 37        | 8         | 0         | 1.000                                      | 0.178                                      |
| -1.00                               | 52        | 36        | 9         | 0         | 1.000                                      | 0.200                                      |
| -0.88                               | 52        | 35        | 10        | 0         | 1.000                                      | 0.222                                      |
| -0.74                               | 52        | 34        | 11        | 0         | 1.000                                      | 0.244                                      |
| -0.67                               | 52        | 33        | 12        | 0         | 1.000                                      | 0.267                                      |
| -0.66                               | 52        | 32        | 13        | 0         | 1.000                                      | 0.289                                      |
| -0.63                               | 52        | 31        | 14        | 0         | 1.000                                      | 0.311                                      |
| -0.55                               | 52        | 30        | 15        | 0         | 1.000                                      | 0.333                                      |
| -0.54                               | 52        | 29        | 16        | 0         | 1.000                                      | 0.356                                      |
| -0.54                               | 52        | 28        | 17        | 0         | 1.000                                      | 0.378                                      |
| -0.53                               | 52        | 27        | 18        | 0         | 1.000                                      | 0.400                                      |
| -0.48                               | 52        | 26        | 19        | 0         | 1.000                                      | 0.422                                      |
| -0.45                               | 52        | 25        | 20        | 0         | 1.000                                      | 0.444                                      |
| -0.44                               | 52        | 24        | 21        | 0         | 1.000                                      | 0.467                                      |
| -0.41                               | 52        | 23        | 22        | 0         | 1.000                                      | 0.489                                      |
| -0.40                               | 52        | 22        | 23        | 0         | 1.000                                      | 0.511                                      |
| -0.22                               | 52        | 21        | 24        | 0         | 1.000                                      | 0.533                                      |
| -0.21                               | 52        | 20        | 25        | 0         | 1.000                                      | 0.556                                      |
| -0.11                               | 52        | 19        | 26        | 0         | 1.000                                      | 0.578                                      |
| -0.10                               | 52        | 18        | 27        | 0         | 1.000                                      | 0.600                                      |
| 0.01                                | 52        | 17        | 28        | 0         | 1.000                                      | 0.622                                      |
| 0.07                                | 52        | 16        | 29        | 0         | 1.000                                      | 0.644                                      |
| 0.21                                | 52        | 15        | 30        | 0         | 1.000                                      | 0.667                                      |
| 0.37                                | 52        | 14        | 31        | 0         | 1.000                                      | 0.689                                      |
| 0.56                                | 52        | 13        | 32        | 0         | 1.000                                      | 0.711                                      |

---

|             |           |          |           |          |              |              |
|-------------|-----------|----------|-----------|----------|--------------|--------------|
| 0.63        | 52        | 12       | 33        | 0        | 1.000        | 0.733        |
| 0.66        | 52        | 11       | 34        | 0        | 1.000        | 0.756        |
| 0.69        | 52        | 10       | 35        | 0        | 1.000        | 0.778        |
| 0.70        | 52        | 9        | 36        | 0        | 1.000        | 0.800        |
| 0.71        | 52        | 8        | 37        | 0        | 1.000        | 0.822        |
| 0.78        | 52        | 7        | 38        | 0        | 1.000        | 0.844        |
| 0.86        | 52        | 6        | 39        | 0        | 1.000        | 0.867        |
| 0.90        | 52        | 5        | 40        | 0        | 1.000        | 0.889        |
| 0.98        | 52        | 4        | 41        | 0        | 1.000        | 0.911        |
| 1.06        | 52        | 3        | 42        | 0        | 1.000        | 0.933        |
| 1.08        | 52        | 2        | 43        | 0        | 1.000        | 0.956        |
| <b>1.10</b> | <b>52</b> | <b>1</b> | <b>44</b> | <b>0</b> | <b>1.000</b> | <b>0.978</b> |
| 1.18        | 51        | 1        | 44        | 1        | 0.981        | 0.978        |
| 1.47        | 50        | 1        | 44        | 2        | 0.962        | 0.978        |
| 1.51        | 50        | 0        | 45        | 2        | 0.962        | 1.000        |
| 1.76        | 49        | 0        | 45        | 3        | 0.942        | 1.000        |
| 2.27        | 48        | 0        | 45        | 4        | 0.923        | 1.000        |
| 2.41        | 47        | 0        | 45        | 5        | 0.904        | 1.000        |
| 2.41        | 46        | 0        | 45        | 6        | 0.885        | 1.000        |
| 2.44        | 45        | 0        | 45        | 7        | 0.865        | 1.000        |
| 2.47        | 44        | 0        | 45        | 8        | 0.846        | 1.000        |
| 2.53        | 43        | 0        | 45        | 9        | 0.827        | 1.000        |
| 2.56        | 42        | 0        | 45        | 10       | 0.808        | 1.000        |
| 2.61        | 41        | 0        | 45        | 11       | 0.788        | 1.000        |
| 2.76        | 40        | 0        | 45        | 12       | 0.769        | 1.000        |
| 2.79        | 39        | 0        | 45        | 13       | 0.750        | 1.000        |
| 2.89        | 38        | 0        | 45        | 14       | 0.731        | 1.000        |
| 2.93        | 37        | 0        | 45        | 15       | 0.712        | 1.000        |
| 2.96        | 36        | 0        | 45        | 16       | 0.692        | 1.000        |
| 2.99        | 35        | 0        | 45        | 17       | 0.673        | 1.000        |
| 3.00        | 34        | 0        | 45        | 18       | 0.654        | 1.000        |
| 3.02        | 33        | 0        | 45        | 19       | 0.635        | 1.000        |
| 3.06        | 32        | 0        | 45        | 20       | 0.615        | 1.000        |
| 3.10        | 31        | 0        | 45        | 21       | 0.596        | 1.000        |
| 3.11        | 30        | 0        | 45        | 22       | 0.577        | 1.000        |
| 3.11        | 29        | 0        | 45        | 23       | 0.558        | 1.000        |
| 3.12        | 28        | 0        | 45        | 24       | 0.538        | 1.000        |
| 3.13        | 27        | 0        | 45        | 25       | 0.519        | 1.000        |
| 3.14        | 26        | 0        | 45        | 26       | 0.500        | 1.000        |
| 3.15        | 25        | 0        | 45        | 27       | 0.481        | 1.000        |
| 3.18        | 24        | 0        | 45        | 28       | 0.462        | 1.000        |
| 3.22        | 22        | 0        | 45        | 30       | 0.423        | 1.000        |
| 3.25        | 21        | 0        | 45        | 31       | 0.404        | 1.000        |
| 3.27        | 20        | 0        | 45        | 32       | 0.385        | 1.000        |
| 3.27        | 19        | 0        | 45        | 33       | 0.365        | 1.000        |
| 3.33        | 18        | 0        | 45        | 34       | 0.346        | 1.000        |
| 3.35        | 17        | 0        | 45        | 35       | 0.327        | 1.000        |
| 3.40        | 16        | 0        | 45        | 36       | 0.308        | 1.000        |
| 3.44        | 15        | 0        | 45        | 37       | 0.288        | 1.000        |
| 3.45        | 14        | 0        | 45        | 38       | 0.269        | 1.000        |

---

---

|      |    |   |    |    |       |       |
|------|----|---|----|----|-------|-------|
| 3.46 | 13 | 0 | 45 | 39 | 0.250 | 1.000 |
| 3.54 | 12 | 0 | 45 | 40 | 0.231 | 1.000 |
| 3.55 | 11 | 0 | 45 | 41 | 0.212 | 1.000 |
| 3.59 | 10 | 0 | 45 | 42 | 0.192 | 1.000 |
| 3.62 | 9  | 0 | 45 | 43 | 0.173 | 1.000 |
| 3.66 | 8  | 0 | 45 | 44 | 0.154 | 1.000 |
| 3.67 | 7  | 0 | 45 | 45 | 0.135 | 1.000 |
| 3.68 | 6  | 0 | 45 | 46 | 0.115 | 1.000 |
| 3.69 | 5  | 0 | 45 | 47 | 0.096 | 1.000 |
| 3.84 | 4  | 0 | 45 | 48 | 0.077 | 1.000 |
| 3.88 | 3  | 0 | 45 | 49 | 0.058 | 1.000 |
| 3.92 | 2  | 0 | 45 | 50 | 0.038 | 1.000 |
| 4.42 | 1  | 0 | 45 | 51 | 0.019 | 1.000 |
| 4.55 | 0  | 0 | 45 | 52 | 0.000 | 1.000 |

---

### Supplementary Table 6

Receiver operating characteristic curve (ROC) analysis for the optimal diagnostic cut-off value of  $\delta_{\text{DOB}}^{13}\text{C}$  (‰) in breath  $\text{CO}_2$  associated with  $^{13}\text{C}$ -labelled glucose metabolism ( $^{13}\text{C}$ -G) in presence [H. p. (+)] and absence [H. p. (-)] of *H. pylori* infection. The selected optimal cut-off value has been highlighted. TP : True positive rate, FP : False positive rate, TN : True negative rate, FN : False negative rate.

| <b><math>^{13}\text{C}</math>-G<br/>[H.p (+) vs H.p (-)]</b> | <b>TP</b> | <b>FP</b> | <b>TN</b> | <b>FN</b> | <b>TP<br/>proportion<br/>(Sensitivity)</b> | <b>TN<br/>proportion<br/>(Specificity)</b> |
|--------------------------------------------------------------|-----------|-----------|-----------|-----------|--------------------------------------------|--------------------------------------------|
| 16.33                                                        | 72        | 54        | 1         | 0         | 1.000                                      | 0.018                                      |
| 19.33                                                        | 72        | 53        | 2         | 0         | 1.000                                      | 0.036                                      |
| 21.36                                                        | 72        | 52        | 3         | 0         | 1.000                                      | 0.055                                      |
| 21.99                                                        | 72        | 51        | 4         | 0         | 1.000                                      | 0.073                                      |
| 22.32                                                        | 72        | 50        | 5         | 0         | 1.000                                      | 0.091                                      |
| 22.32                                                        | 72        | 49        | 6         | 0         | 1.000                                      | 0.109                                      |
| 22.39                                                        | 72        | 48        | 7         | 0         | 1.000                                      | 0.127                                      |
| 23.11                                                        | 72        | 47        | 8         | 0         | 1.000                                      | 0.145                                      |
| 23.20                                                        | 72        | 46        | 9         | 0         | 1.000                                      | 0.164                                      |
| 23.64                                                        | 72        | 45        | 10        | 0         | 1.000                                      | 0.182                                      |
| 23.88                                                        | 72        | 44        | 11        | 0         | 1.000                                      | 0.200                                      |
| 24.25                                                        | 72        | 43        | 12        | 0         | 1.000                                      | 0.218                                      |
| 24.33                                                        | 72        | 42        | 13        | 0         | 1.000                                      | 0.236                                      |
| 24.55                                                        | 72        | 41        | 14        | 0         | 1.000                                      | 0.255                                      |
| 24.69                                                        | 72        | 40        | 15        | 0         | 1.000                                      | 0.273                                      |
| 25.33                                                        | 72        | 39        | 16        | 0         | 1.000                                      | 0.291                                      |
| 25.33                                                        | 72        | 38        | 17        | 0         | 1.000                                      | 0.309                                      |
| 25.33                                                        | 72        | 36        | 19        | 0         | 1.000                                      | 0.345                                      |
| 25.33                                                        | 72        | 35        | 20        | 0         | 1.000                                      | 0.364                                      |
| 25.36                                                        | 72        | 34        | 21        | 0         | 1.000                                      | 0.382                                      |
| 25.96                                                        | 72        | 33        | 22        | 0         | 1.000                                      | 0.400                                      |
| 25.99                                                        | 72        | 32        | 23        | 0         | 1.000                                      | 0.418                                      |
| 25.99                                                        | 72        | 31        | 24        | 0         | 1.000                                      | 0.436                                      |
| 25.99                                                        | 72        | 30        | 25        | 0         | 1.000                                      | 0.455                                      |
| 26.20                                                        | 72        | 29        | 26        | 0         | 1.000                                      | 0.473                                      |
| 26.33                                                        | 72        | 28        | 27        | 0         | 1.000                                      | 0.491                                      |
| 26.33                                                        | 72        | 27        | 28        | 0         | 1.000                                      | 0.509                                      |
| 26.33                                                        | 72        | 26        | 29        | 0         | 1.000                                      | 0.527                                      |
| 26.50                                                        | 72        | 25        | 30        | 0         | 1.000                                      | 0.545                                      |
| 26.99                                                        | 72        | 24        | 31        | 0         | 1.000                                      | 0.564                                      |
| 27.00                                                        | 72        | 23        | 32        | 0         | 1.000                                      | 0.582                                      |
| 27.23                                                        | 72        | 22        | 33        | 0         | 1.000                                      | 0.600                                      |



---

|              |           |          |           |          |              |              |
|--------------|-----------|----------|-----------|----------|--------------|--------------|
| 27.33        | 72        | 21       | 34        | 0        | 1.000        | 0.618        |
| 27.44        | 72        | 20       | 35        | 0        | 1.000        | 0.636        |
| 27.55        | 72        | 19       | 36        | 0        | 1.000        | 0.655        |
| 27.65        | 72        | 18       | 37        | 0        | 1.000        | 0.673        |
| 27.66        | 72        | 17       | 38        | 0        | 1.000        | 0.691        |
| 27.66        | 72        | 16       | 39        | 0        | 1.000        | 0.709        |
| 27.84        | 72        | 15       | 40        | 0        | 1.000        | 0.727        |
| 28.33        | 72        | 13       | 42        | 0        | 1.000        | 0.764        |
| 28.66        | 72        | 12       | 43        | 0        | 1.000        | 0.782        |
| 28.77        | 72        | 11       | 44        | 0        | 1.000        | 0.800        |
| 28.90        | 72        | 10       | 45        | 0        | 1.000        | 0.818        |
| 28.99        | 72        | 9        | 46        | 0        | 1.000        | 0.836        |
| 29.32        | 72        | 8        | 47        | 0        | 1.000        | 0.855        |
| 29.32        | 72        | 7        | 48        | 0        | 1.000        | 0.873        |
| 29.33        | 72        | 6        | 49        | 0        | 1.000        | 0.891        |
| 29.74        | 72        | 5        | 50        | 0        | 1.000        | 0.909        |
| 30.20        | 72        | 4        | 51        | 0        | 1.000        | 0.927        |
| 30.80        | 72        | 3        | 52        | 0        | 1.000        | 0.945        |
| 31.97        | 72        | 2        | 53        | 0        | 1.000        | 0.964        |
| 33.12        | 72        | 1        | 54        | 0        | 1.000        | 0.982        |
| <b>33.32</b> | <b>72</b> | <b>0</b> | <b>55</b> | <b>0</b> | <b>1.000</b> | <b>1.000</b> |
| 40.09        | 71        | 0        | 55        | 1        | 0.986        | 1.000        |
| 41.89        | 70        | 0        | 55        | 2        | 0.972        | 1.000        |
| 46.28        | 69        | 0        | 55        | 3        | 0.958        | 1.000        |
| 46.55        | 68        | 0        | 55        | 4        | 0.944        | 1.000        |
| 47.24        | 67        | 0        | 55        | 5        | 0.931        | 1.000        |
| 48.32        | 66        | 0        | 55        | 6        | 0.917        | 1.000        |
| 49.25        | 65        | 0        | 55        | 7        | 0.903        | 1.000        |
| 49.44        | 64        | 0        | 55        | 8        | 0.889        | 1.000        |
| 49.56        | 63        | 0        | 55        | 9        | 0.875        | 1.000        |
| 49.64        | 62        | 0        | 55        | 10       | 0.861        | 1.000        |
| 49.99        | 61        | 0        | 55        | 11       | 0.847        | 1.000        |
| 50.23        | 60        | 0        | 55        | 12       | 0.833        | 1.000        |
| 50.24        | 59        | 0        | 55        | 13       | 0.819        | 1.000        |
| 50.36        | 58        | 0        | 55        | 14       | 0.806        | 1.000        |
| 50.45        | 57        | 0        | 55        | 15       | 0.792        | 1.000        |
| 50.55        | 56        | 0        | 55        | 16       | 0.778        | 1.000        |
| 50.74        | 55        | 0        | 55        | 17       | 0.764        | 1.000        |
| 50.99        | 54        | 0        | 55        | 18       | 0.750        | 1.000        |
| 51.13        | 53        | 0        | 55        | 19       | 0.736        | 1.000        |
| 51.20        | 52        | 0        | 55        | 20       | 0.722        | 1.000        |
| 51.22        | 51        | 0        | 55        | 21       | 0.708        | 1.000        |
| 51.23        | 50        | 0        | 55        | 22       | 0.694        | 1.000        |
| 51.23        | 49        | 0        | 55        | 23       | 0.681        | 1.000        |
| 51.24        | 48        | 0        | 55        | 24       | 0.667        | 1.000        |
| 51.25        | 47        | 0        | 55        | 25       | 0.653        | 1.000        |
| 51.32        | 46        | 0        | 55        | 26       | 0.639        | 1.000        |
| 51.33        | 45        | 0        | 55        | 27       | 0.625        | 1.000        |
| 51.36        | 44        | 0        | 55        | 28       | 0.611        | 1.000        |
| 51.97        | 43        | 0        | 55        | 29       | 0.597        | 1.000        |

---

---

|       |    |   |    |    |       |       |
|-------|----|---|----|----|-------|-------|
| 52.00 | 42 | 0 | 55 | 30 | 0.583 | 1.000 |
| 52.10 | 41 | 0 | 55 | 31 | 0.569 | 1.000 |
| 52.12 | 40 | 0 | 55 | 32 | 0.556 | 1.000 |
| 52.31 | 39 | 0 | 55 | 33 | 0.542 | 1.000 |
| 52.34 | 38 | 0 | 55 | 34 | 0.528 | 1.000 |
| 52.36 | 37 | 0 | 55 | 35 | 0.514 | 1.000 |
| 52.36 | 36 | 0 | 55 | 36 | 0.500 | 1.000 |
| 52.37 | 35 | 0 | 55 | 37 | 0.486 | 1.000 |
| 52.39 | 34 | 0 | 55 | 38 | 0.472 | 1.000 |
| 52.66 | 33 | 0 | 55 | 39 | 0.458 | 1.000 |
| 52.82 | 32 | 0 | 55 | 40 | 0.444 | 1.000 |
| 52.85 | 31 | 0 | 55 | 41 | 0.431 | 1.000 |
| 52.94 | 30 | 0 | 55 | 42 | 0.417 | 1.000 |
| 53.00 | 29 | 0 | 55 | 43 | 0.403 | 1.000 |
| 53.02 | 28 | 0 | 55 | 44 | 0.389 | 1.000 |
| 53.23 | 27 | 0 | 55 | 45 | 0.375 | 1.000 |
| 53.33 | 26 | 0 | 55 | 46 | 0.361 | 1.000 |
| 53.55 | 25 | 0 | 55 | 47 | 0.347 | 1.000 |
| 53.62 | 24 | 0 | 55 | 48 | 0.333 | 1.000 |
| 53.65 | 23 | 0 | 55 | 49 | 0.319 | 1.000 |
| 53.78 | 22 | 0 | 55 | 50 | 0.306 | 1.000 |
| 53.81 | 21 | 0 | 55 | 51 | 0.292 | 1.000 |
| 53.87 | 20 | 0 | 55 | 52 | 0.278 | 1.000 |
| 54.21 | 19 | 0 | 55 | 53 | 0.264 | 1.000 |
| 54.23 | 18 | 0 | 55 | 54 | 0.250 | 1.000 |
| 54.25 | 17 | 0 | 55 | 55 | 0.236 | 1.000 |
| 54.33 | 16 | 0 | 55 | 56 | 0.222 | 1.000 |
| 54.33 | 15 | 0 | 55 | 57 | 0.208 | 1.000 |
| 56.21 | 14 | 0 | 55 | 58 | 0.194 | 1.000 |
| 56.29 | 13 | 0 | 55 | 59 | 0.181 | 1.000 |
| 56.32 | 12 | 0 | 55 | 60 | 0.167 | 1.000 |
| 56.77 | 11 | 0 | 55 | 61 | 0.153 | 1.000 |
| 56.85 | 10 | 0 | 55 | 62 | 0.139 | 1.000 |
| 57.22 | 9  | 0 | 55 | 63 | 0.125 | 1.000 |
| 57.23 | 8  | 0 | 55 | 64 | 0.111 | 1.000 |
| 57.84 | 7  | 0 | 55 | 65 | 0.097 | 1.000 |
| 58.44 | 6  | 0 | 55 | 66 | 0.083 | 1.000 |
| 58.57 | 5  | 0 | 55 | 67 | 0.069 | 1.000 |
| 59.36 | 4  | 0 | 55 | 68 | 0.056 | 1.000 |
| 59.36 | 3  | 0 | 55 | 69 | 0.042 | 1.000 |
| 59.50 | 2  | 0 | 55 | 70 | 0.028 | 1.000 |
| 59.56 | 1  | 0 | 55 | 71 | 0.014 | 1.000 |
| 60.40 | 0  | 0 | 55 | 72 | 0.000 | 1.000 |

---

### Supplementary Table 7

Receiver operating characteristic curve (ROC) analysis for the optimal diagnostic cut-off value of  $\delta_{\text{DOB}}^{13}\text{C}$  (‰) in breath  $\text{CO}_2$  associated with unlabelled glucose (12C-G) metabolism in presence [H. p. (+)] and absence [H. p. (-)] of *H. pylori* infection. The selected optimal cut-off value has been highlighted. TP : True positive rate, FP : False positive rate, TN : True negative rate, FN : False negative rate.

| <b>12C-G<br/>[H.p (+) vs H.p (-)]</b> | <b>TP</b> | <b>FP</b> | <b>TN</b> | <b>FN</b> | <b>TP<br/>proportion<br/>(Sensitivity)</b> | <b>TN<br/>proportion<br/>(Specificity)</b> |
|---------------------------------------|-----------|-----------|-----------|-----------|--------------------------------------------|--------------------------------------------|
| -2.37                                 | 52        | 43        | 1         | 0         | 1.000                                      | 0.023                                      |
| -2.33                                 | 52        | 42        | 2         | 0         | 1.000                                      | 0.045                                      |
| -2.32                                 | 52        | 40        | 4         | 0         | 1.000                                      | 0.091                                      |
| -1.37                                 | 52        | 39        | 5         | 0         | 1.000                                      | 0.114                                      |
| -1.33                                 | 52        | 38        | 6         | 0         | 1.000                                      | 0.136                                      |
| -1.32                                 | 52        | 37        | 7         | 0         | 1.000                                      | 0.159                                      |
| -1.27                                 | 52        | 36        | 8         | 0         | 1.000                                      | 0.182                                      |
| -1.23                                 | 52        | 35        | 9         | 0         | 1.000                                      | 0.205                                      |
| -1.10                                 | 52        | 34        | 10        | 0         | 1.000                                      | 0.227                                      |
| -1.03                                 | 52        | 33        | 11        | 0         | 1.000                                      | 0.250                                      |
| -1.00                                 | 52        | 32        | 12        | 0         | 1.000                                      | 0.273                                      |
| -0.98                                 | 52        | 31        | 13        | 0         | 1.000                                      | 0.295                                      |
| -0.83                                 | 52        | 30        | 14        | 0         | 1.000                                      | 0.318                                      |
| -0.56                                 | 52        | 29        | 15        | 0         | 1.000                                      | 0.341                                      |
| -0.38                                 | 52        | 28        | 16        | 0         | 1.000                                      | 0.364                                      |
| -0.33                                 | 52        | 27        | 17        | 0         | 1.000                                      | 0.386                                      |
| -0.31                                 | 52        | 26        | 18        | 0         | 1.000                                      | 0.409                                      |
| -0.29                                 | 52        | 25        | 19        | 0         | 1.000                                      | 0.432                                      |
| -0.22                                 | 52        | 24        | 20        | 0         | 1.000                                      | 0.455                                      |
| -0.22                                 | 52        | 23        | 21        | 0         | 1.000                                      | 0.477                                      |
| -0.21                                 | 52        | 22        | 22        | 0         | 1.000                                      | 0.500                                      |
| -0.21                                 | 52        | 21        | 23        | 0         | 1.000                                      | 0.523                                      |
| -0.13                                 | 52        | 20        | 24        | 0         | 1.000                                      | 0.545                                      |
| 0.27                                  | 52        | 19        | 25        | 0         | 1.000                                      | 0.568                                      |
| 0.31                                  | 51        | 19        | 25        | 1         | 0.981                                      | 0.568                                      |
| 0.33                                  | 51        | 18        | 26        | 1         | 0.981                                      | 0.591                                      |
| 0.55                                  | 51        | 17        | 27        | 1         | 0.981                                      | 0.614                                      |
| 0.81                                  | 51        | 16        | 28        | 1         | 0.981                                      | 0.636                                      |
| 0.84                                  | 51        | 15        | 29        | 1         | 0.981                                      | 0.659                                      |
| 0.91                                  | 51        | 14        | 30        | 1         | 0.981                                      | 0.682                                      |
| 0.92                                  | 51        | 13        | 31        | 1         | 0.981                                      | 0.705                                      |
| 0.97                                  | 51        | 12        | 32        | 1         | 0.981                                      | 0.727                                      |

---

|      |    |    |    |    |       |       |
|------|----|----|----|----|-------|-------|
| 1.01 | 51 | 11 | 33 | 1  | 0.981 | 0.750 |
| 1.03 | 51 | 10 | 34 | 1  | 0.981 | 0.773 |
| 1.14 | 51 | 9  | 35 | 1  | 0.981 | 0.795 |
| 1.15 | 51 | 8  | 36 | 1  | 0.981 | 0.818 |
| 1.22 | 51 | 6  | 38 | 1  | 0.981 | 0.864 |
| 1.31 | 51 | 5  | 39 | 1  | 0.981 | 0.886 |
| 1.31 | 51 | 4  | 40 | 1  | 0.981 | 0.909 |
| 1.47 | 51 | 3  | 41 | 1  | 0.981 | 0.932 |
| 1.50 | 51 | 2  | 42 | 1  | 0.981 | 0.955 |
| 1.51 | 51 | 1  | 43 | 1  | 0.981 | 0.977 |
| 1.83 | 50 | 1  | 43 | 2  | 0.962 | 0.977 |
| 1.93 | 49 | 1  | 43 | 3  | 0.942 | 0.977 |
| 2.03 | 48 | 1  | 43 | 4  | 0.923 | 0.977 |
| 2.09 | 48 | 0  | 44 | 4  | 0.923 | 1.000 |
| 2.11 | 47 | 0  | 44 | 5  | 0.904 | 1.000 |
| 2.31 | 46 | 0  | 44 | 6  | 0.885 | 1.000 |
| 2.33 | 45 | 0  | 44 | 7  | 0.865 | 1.000 |
| 2.43 | 44 | 0  | 44 | 8  | 0.846 | 1.000 |
| 2.51 | 43 | 0  | 44 | 9  | 0.827 | 1.000 |
| 2.66 | 42 | 0  | 44 | 10 | 0.808 | 1.000 |
| 2.73 | 40 | 0  | 44 | 12 | 0.769 | 1.000 |
| 2.75 | 38 | 0  | 44 | 14 | 0.731 | 1.000 |
| 2.81 | 37 | 0  | 44 | 15 | 0.712 | 1.000 |
| 2.96 | 36 | 0  | 44 | 16 | 0.692 | 1.000 |
| 3.00 | 35 | 0  | 44 | 17 | 0.673 | 1.000 |
| 3.06 | 34 | 0  | 44 | 18 | 0.654 | 1.000 |
| 3.11 | 32 | 0  | 44 | 20 | 0.615 | 1.000 |
| 3.19 | 31 | 0  | 44 | 21 | 0.596 | 1.000 |
| 3.22 | 30 | 0  | 44 | 22 | 0.577 | 1.000 |
| 3.25 | 29 | 0  | 44 | 23 | 0.558 | 1.000 |
| 3.33 | 28 | 0  | 44 | 24 | 0.538 | 1.000 |
| 3.34 | 26 | 0  | 44 | 26 | 0.500 | 1.000 |
| 3.36 | 25 | 0  | 44 | 27 | 0.481 | 1.000 |
| 3.47 | 24 | 0  | 44 | 28 | 0.462 | 1.000 |
| 3.48 | 23 | 0  | 44 | 29 | 0.442 | 1.000 |
| 3.66 | 22 | 0  | 44 | 30 | 0.423 | 1.000 |
| 3.69 | 21 | 0  | 44 | 31 | 0.404 | 1.000 |
| 3.71 | 20 | 0  | 44 | 32 | 0.385 | 1.000 |
| 3.74 | 19 | 0  | 44 | 33 | 0.365 | 1.000 |
| 3.77 | 18 | 0  | 44 | 34 | 0.346 | 1.000 |
| 3.78 | 17 | 0  | 44 | 35 | 0.327 | 1.000 |
| 3.86 | 16 | 0  | 44 | 36 | 0.308 | 1.000 |
| 3.87 | 14 | 0  | 44 | 38 | 0.269 | 1.000 |
| 3.88 | 13 | 0  | 44 | 39 | 0.250 | 1.000 |
| 3.94 | 12 | 0  | 44 | 40 | 0.231 | 1.000 |
| 3.97 | 11 | 0  | 44 | 41 | 0.212 | 1.000 |
| 4.01 | 10 | 0  | 44 | 42 | 0.192 | 1.000 |
| 4.02 | 9  | 0  | 44 | 43 | 0.173 | 1.000 |
| 4.13 | 8  | 0  | 44 | 44 | 0.154 | 1.000 |
| 4.22 | 7  | 0  | 44 | 45 | 0.135 | 1.000 |

---

---

|      |   |   |    |    |       |       |
|------|---|---|----|----|-------|-------|
| 4.27 | 6 | 0 | 44 | 46 | 0.115 | 1.000 |
| 4.29 | 5 | 0 | 44 | 47 | 0.096 | 1.000 |
| 4.33 | 4 | 0 | 44 | 48 | 0.077 | 1.000 |
| 4.59 | 3 | 0 | 44 | 49 | 0.058 | 1.000 |
| 4.62 | 2 | 0 | 44 | 50 | 0.038 | 1.000 |
| 5.11 | 1 | 0 | 44 | 51 | 0.019 | 1.000 |
| 5.99 | 0 | 0 | 44 | 52 | 0.000 | 1.000 |

---
